# Supplementary material
Source: PubMed Central journal article supplement (PMC5158264)
Supplement: NIHMS828809-supplement-Supplemental_Information.pdf [file NIHMS828809-supplement-Supplemental_Information.pdf]

This is the *Science* template for presenting and formatting your Supplementary Materials. To organize your Supplementary Materials section, please follow the instructions below. Once formatted, you should delete this first page of instructions. This template is designed to provide an indexed/bookmarked PDF file that will help readers navigate to sections or specific figures or tables. To ensure proper indexing, please maintain the Word styles in the template or reapply them afterward.

### **Overview:**

Supplementary Materials present additional information in support of the conclusions of your paper, such as a description of the materials and methods, controls, or tabulated data presented in graphs or figures in the paper. It will generally consist of one integrated PDF file. Audio or movie files or large data tables can be presented as separate files. Further information is available [here](#).

This section should not be used for additional discussion, analysis, or interpretations. It is not to be used as a forum to critique other publications.

References can be cited in the supplementary text section. These should be cited in order following the references in the main text as per *Science* style (italicized number in parentheses). One full reference list should be provided for all of the cited references at the end of the main paper.

### **Using the Template**

Paste the appropriate text (title, author list and corresponding authors into the cover page). Keep our original formatting, or reapply the appropriate styles after pasting. There are three Word paragraph styles: SM Heading (to be applied to Major heads including Figure and Table labels), SM Subheading (to be applied to subheads), and SOM text (for text, equations, etc.) and SM captions (for figure or table captions)

On the cover page, complete the relevant description of the SM (by deleting text that does not apply).

Copy and paste relevant text into each appropriate section of the template. Keep the formatting of this template, or restyle paragraphs as indicated. Each figure should be on a separate page and can be placed above each caption. To add additional captions, simply copy and paste (repeatedly) the last caption template. Large tables that extend beyond the width of the page should be provided as separate files.

Large amounts of text can be grouped by subheads. To repeat subheads, simply copy the subhead and reapeat/rename. To add more figures, copy and paste to repeat the styled dummy text for more figure or table captions.
